# Supplementary material
Source: PubMed Central journal article supplement (PMC6783361)
Supplement: NIHMS1535640-supplement-2.pdf [file NIHMS1535640-supplement-2.pdf]

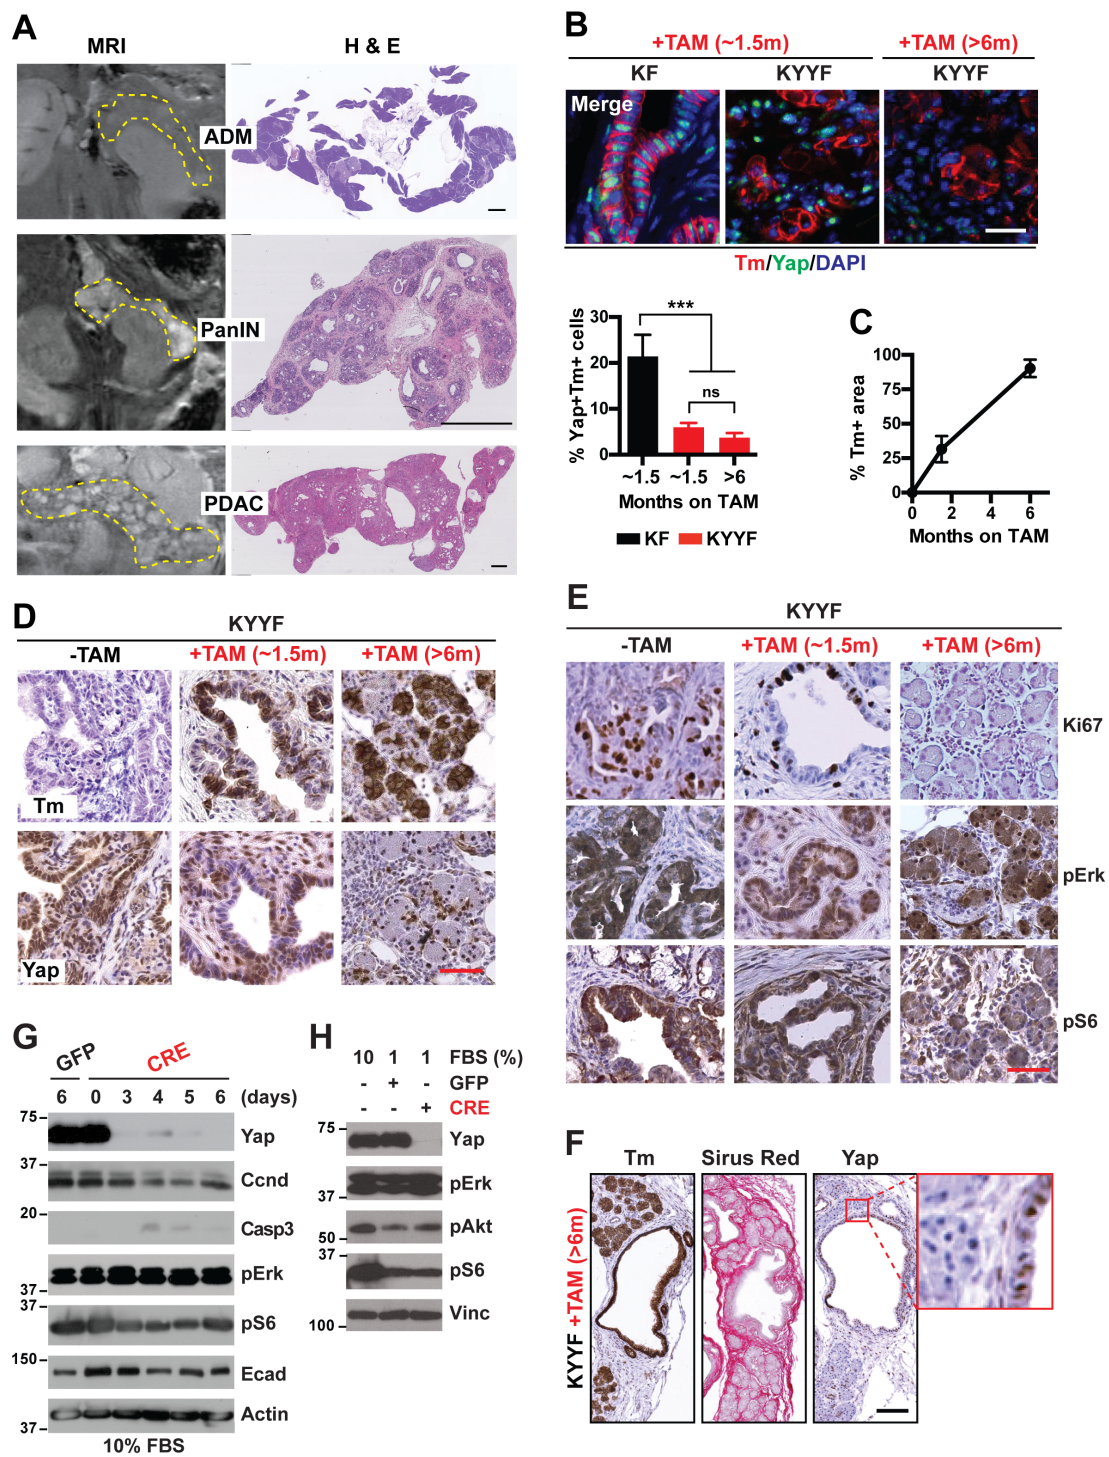

Murakami *et al.* Figure S1

**Figure S1. Related to Figure 1; TAM treatment induces mosaic and progressive *Yap* loss in pancreatic tumors without affecting canonical *Kras* signaling.**

**(A)** Representative MRI and corresponding H&E images of pancreatic lesions at different stages of disease progression. Scale bar = 1 mm. Yellow dotted line marks the pancreas in each MRI image.

**(B)** Representative images and quantification of IF staining for tdTomato (Tm, red), Yap (green) and DAPI (blue) in KF and KYYF pancreata after ~1.5 months and >6 months of TAM treatment. Scale bar = 100  $\mu\text{m}$ .  $n = 5$ .

**(C)** Quantification of percent of Tm-positive area before or after 1.5 months or 6 months of TAM treatment.

**(D)** Representative IHC images of Tm and Yap in KYYF pancreata before or after ~1.5 months or >6 months of TAM treatment. Scale bar = 50  $\mu\text{m}$ .

**(E)** Representative IHC images of Ki67, pErk, and pS6 in KYYF pancreata before or after ~1.5 months or >6 months of TAM treatment. Scale bar = 50  $\mu\text{m}$ .

**(F)** IHC images of Tm, Sirius Red, and Yap in a matched region containing residual ductal lesions of a KYYF pancreas treated for >6 months with TAM. Scale bar = 100  $\mu\text{m}$ .

**(G)** Western blot analysis of indicated proteins in KYYF cells at different days post GFP or CRE treatment in growth medium containing 10% FBS. Actin was used as the loading control. Shown is representative of at least three independent experiments.

**(H)** Western blot analysis of indicated proteins in KYYF cells at different 5 days post GFP or CRE treatment in growth medium containing 1% FBS or 10% FBS. Vinculin (Vinc) was used as the loading control. Shown is representative of at least three independent experiments.

\*\*\* $P < 0.0005$ . ns: not significant. Error bars indicate s.d.

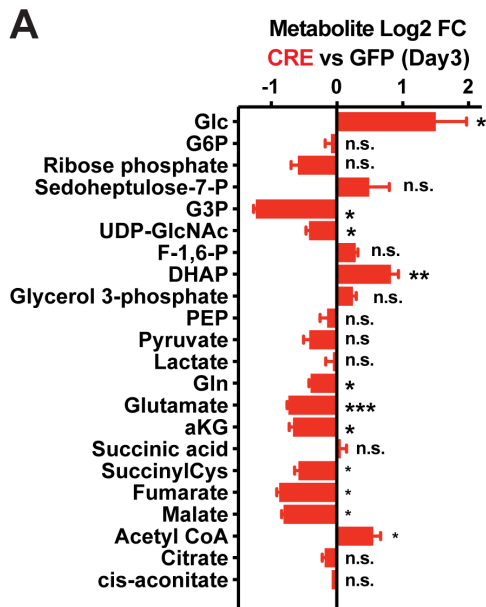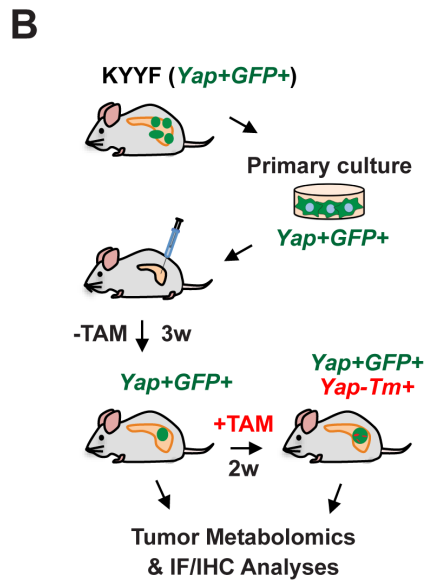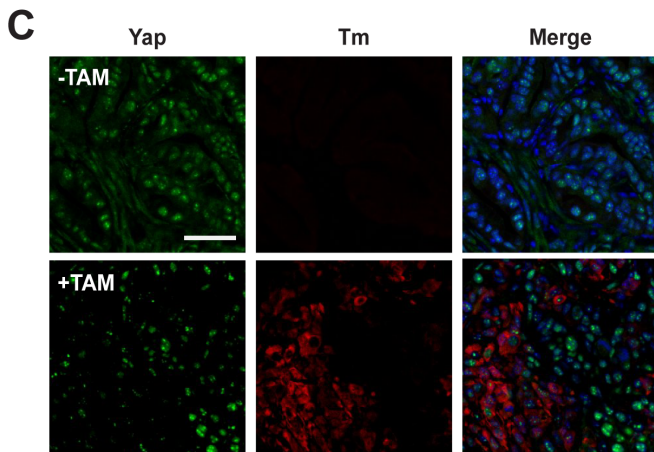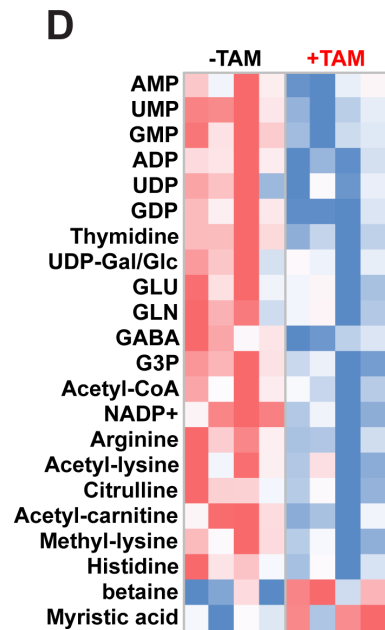

**E**

| Pathways downregulated in TAM-treated tumors | P value  |
|----------------------------------------------|----------|
| Nitrogen metabolism                          | 2.23E-04 |
| Arginine and proline metabolism              | 3.22E-04 |
| Purine metabolism                            | 2.45E-03 |
| Pyrimidine metabolism                        | 2.53E-03 |
| Butanoate metabolism                         | 3.61E-03 |

Murakami *et al.* Figure S2

**Figure S2. Related to Figure 2; Yap loss induces global metabolic changes in vitro and in vivo.**

**(A)** Log<sub>2</sub> FC in the levels of indicated metabolites related to glucose/glutamine metabolism as measured by LC-MS/MS. \* $P < 0.05$ . \*\* $P < 0.005$ . \*\*\* $P < 0.0005$ . ns: not significant. Error bars indicate s.d.

**(B)** Illustration of the experimental design of orthotopic tumor studies. Primary pancreatic tumor cells were isolated from a tumor-bearing KYYF mouse that was not subjected to TAM treatment, labeled with a luciferase-GFP reporter in vitro, and injected orthotopically into nude mice. Once the tumor bioluminescence signal reaches to a pre-determined level at approximately three weeks post injection, tumor-bearing mice were either sacrificed for tumor harvesting or switched to a TAM-containing diet for two additional weeks to induce *Yap* deletion. Resected tumors were divided for metabolomics, IF and IHC analyses.

**(C)** Representative images of IF staining for Yap (green), Tm (red) and DAPI (blue) in KYYF pancreata after 15 days of TAM treatment. Scale bar = 100  $\mu$ m.  $n = 5$ .

**(D)** Heatmap showing metabolites significantly changed between TAM-treated (+TAM) and untreated (-TAM) orthotopic pancreatic tumors as measured by LC-MS/MS.  $n = 4$ .

**(E)** P-value ranking of metabolic pathways significantly downregulated in TAM-treated versus untreated orthotopic pancreatic tumors in targeted LC-MS/MS metabolic analysis.  $n = 4$ .

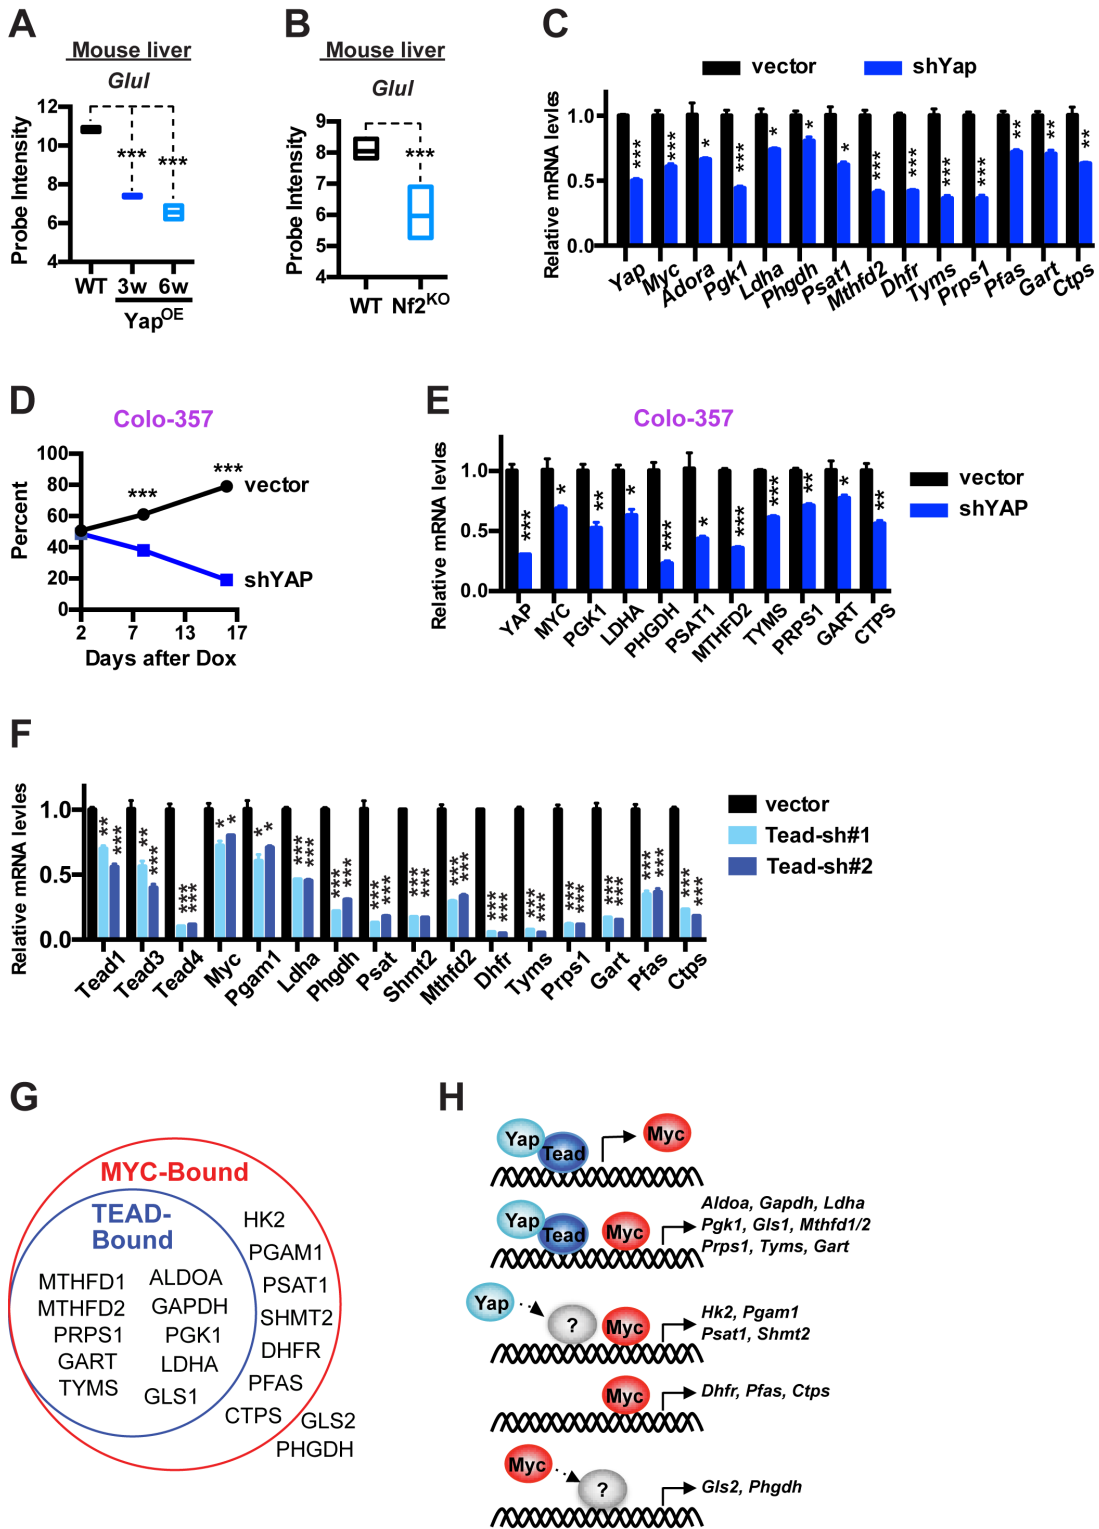

Murakami et al. Figure S3

**Figure S3. Related to Figure 3; Yap and Teads control the expression of Myc and metabolic genes in both mouse and human pancreatic tumor cells.**

**(A-B)** Probe intensities of *Glul* in published microarray analysis comparing WT livers to livers induced to overexpress Yap for 3 or 6 weeks (Yap<sup>OE</sup> 3w, or Yap<sup>OE</sup> 6w) **(A)** or to *Nf2* knockout livers **(B)**.

**(C)** Relative mRNA levels of indicated genes in Kras mutant primary mouse pancreatic tumor cells expressing vector control or shYap. *n* = 3.

**(D)** Changes in the ratios of human Colo-357 PDAC cells expressing vector control or shYAP co-cultured over indicated time and analyzed periodically by flow cytometry. *n* = 3.

**(E)** Relative mRNA levels of indicated genes in Colo-357 expressing vector control or shYAP. *n* = 3.

**(F)** Relative mRNA levels of indicated genes in mouse pancreatic tumor cells expressing vector control, or two independent shTeads. *n* = 3.

**(G)** Venn diagram and representative enrichment peaks of H3K27ac, MYC, and TEAD4 along the promoters of Yap-regulated metabolic genes illustrating the statuses of TEAD4 or MYC binding based on matched published ChIP-seq datasets from HepG2, HCT-116, A549 and K562 cells.

**(H)** Schematic illustrating the different types of transcription control of various metabolic enzymes by Yap/Tead and/or Myc and possibly additional factors.

\**P* < 0.05. \*\**P* < 0.005. \*\*\**P* < 0.0005. Error bars indicate s.d.

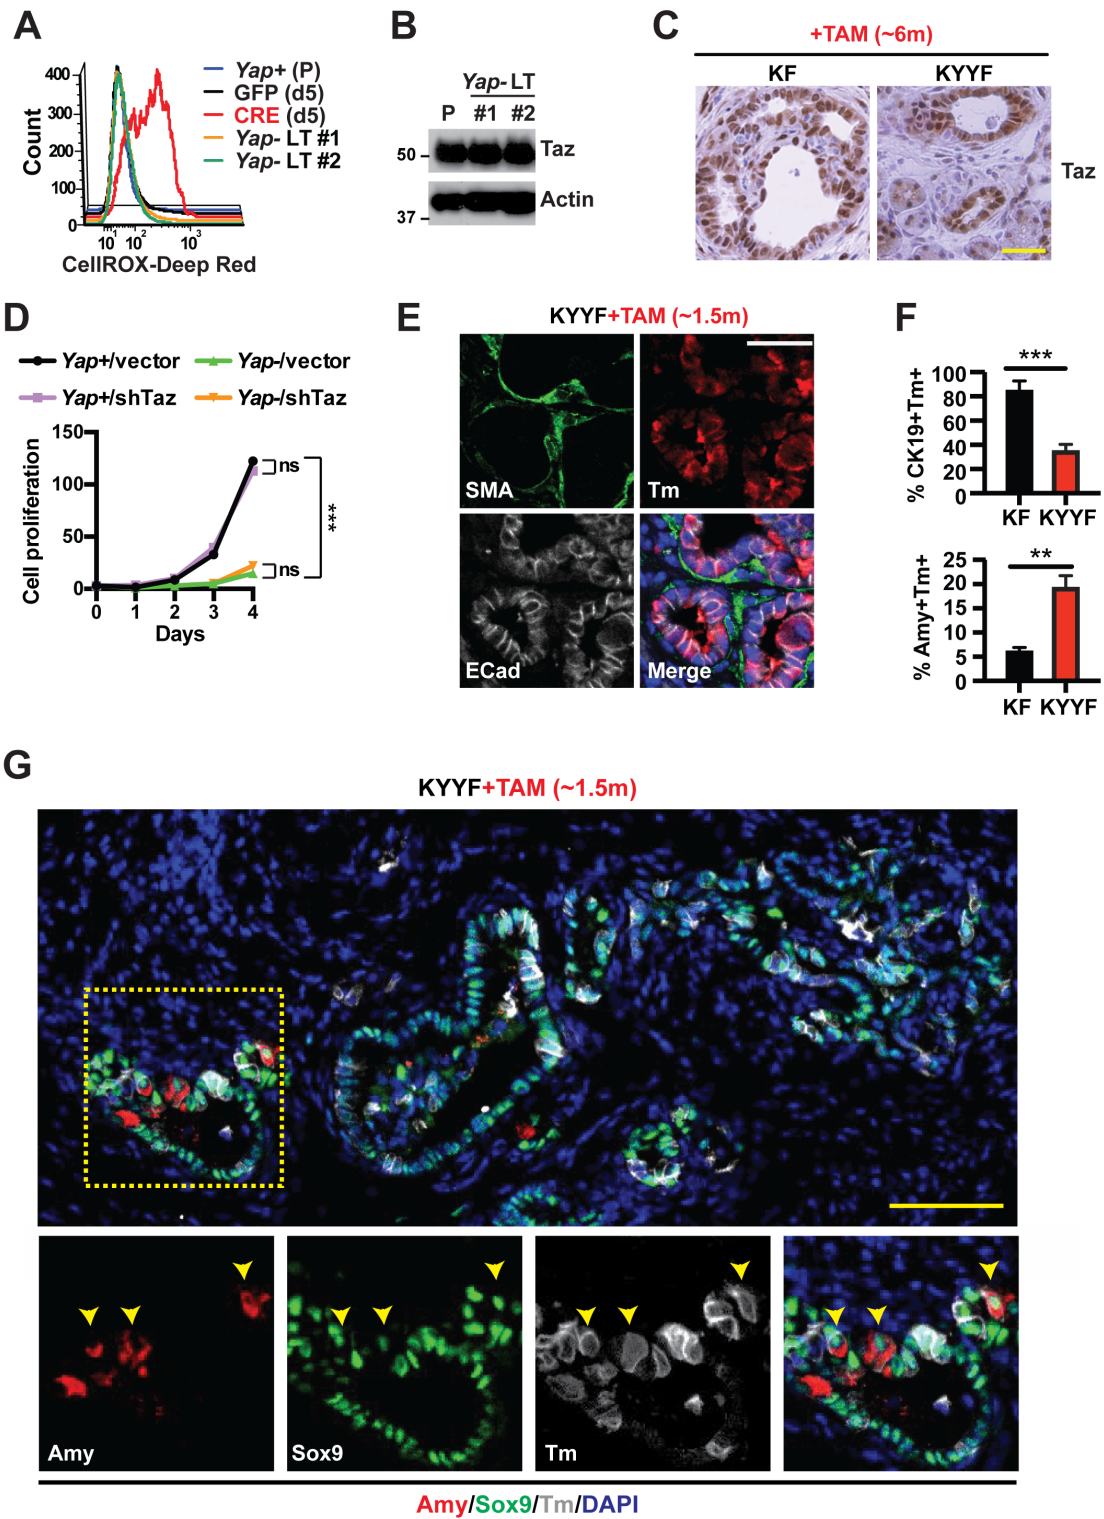

Murakami *et al.* Figure S4

**Figure S4. Related to Figure 4; Yap loss does not induce compensatory Taz upregulation or overt EMT in Kras mutant pancreatic tumor cells.**

**(A)** Representative flow cytometry plot of CellROX-stained *Yap*<sup>+</sup> parental (P) KYYF cells, KYYF cells at 5 days post GFP or CRE treatment, or two long-term *Yap*-deleted KYYF lines (*Yap*- LT #1 and #2).

**(B)** Western blot analysis of TAZ in *Yap*<sup>+</sup> parental (P) and two long-term *Yap*-deleted KYYF lines (*Yap*- LT #1 and #2). Actin was used as the loading control. Shown is representative of at least three independent experiments.

**(C)** Representative IHC images of Taz in KF and KYYF pancreata after ~6 months of TAM treatment. Scale bar =100  $\mu$ m.

**(D)** Growth curve of *Yap*<sup>+</sup> and *Yap*<sup>-</sup> mouse pancreatic tumor cells expressing vector control or shTaz. *n* = 3.

**(E)** Representative images of IF staining for SMA (green), tdTomato (red), E-Cad (grey) and DAPI (blue) in KYYF pancreata after ~1.5 months of TAM treatment. Scale bar=100  $\mu$ m.

**(F)** Quantification of IF staining for Amy, CK19 and Tm in KF and KYYF pancreata after ~1.5 months of TAM treatment.

**(G)** Representative images of IF staining for Amy (red), Sox9 (green), Tm (gray) and DAPI (blue) in the KYYF pancreata after ~1.5 months of TAM treatment. Scale bar = 100  $\mu$ m.

\**P* < 0.05. \*\**P* < 0.005. \*\*\**P* < 0.0005. ns: not significant. Error bars indicate s.d.



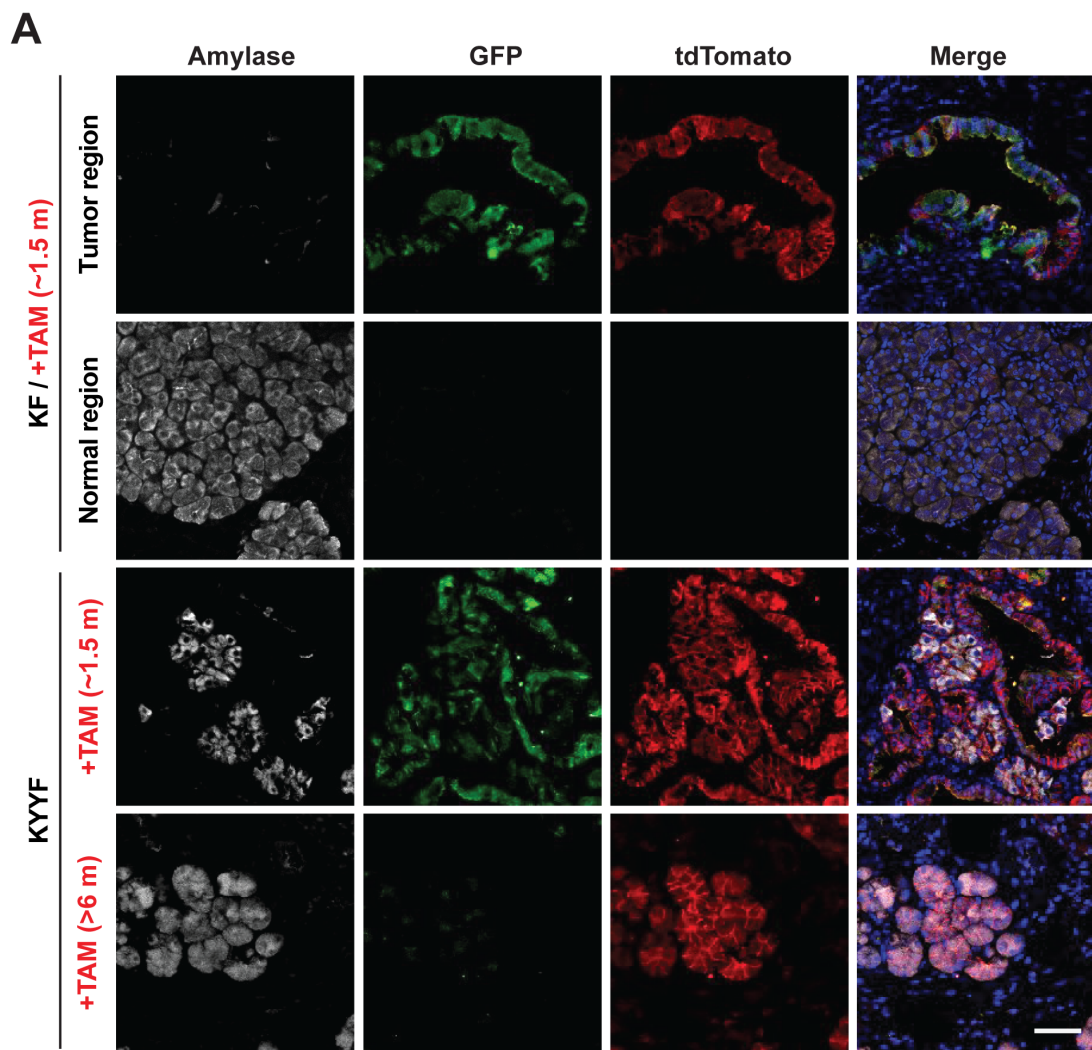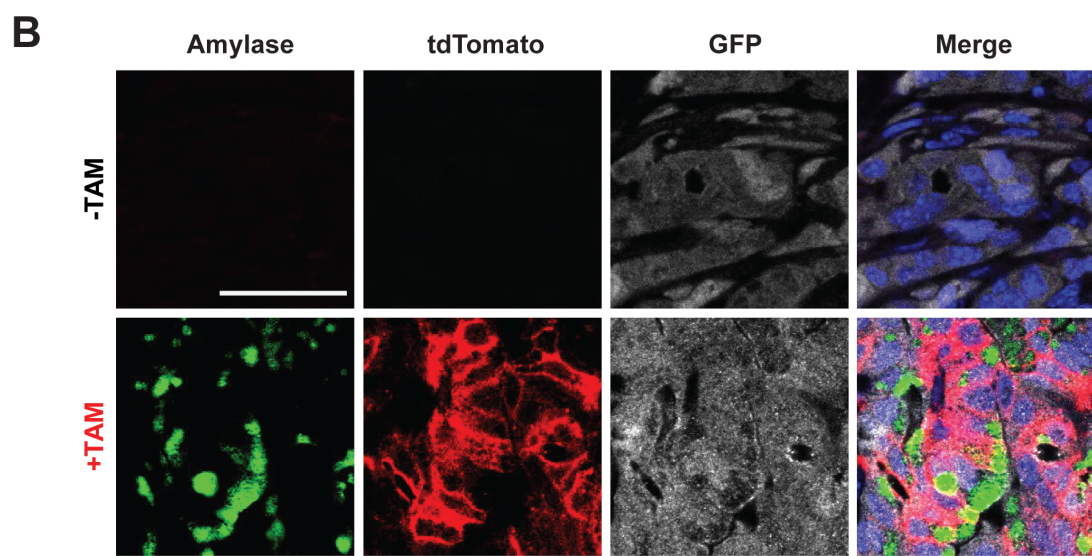

Orthotopic KYY Tumors

**Figure S5. Related to Figure 5; Persistent *Yap* loss induces re-expression of Amylase in spontaneous and orthotopic *Kras* mutant pancreatic tumors.**

**(A)** Representative images of IF staining for Amylase (gray), GFP (green) or tdTomato (red) and DAPI (blue) in KF and KYYF pancreata after ~1.5 months or >6 months of TAM treatment. Scale bar indicates 100  $\mu\text{m}$ .

**(B)** Representative IF images of Amylase (green), tdTomato (red), and GFP (gray) in untreated (-TAM) or TAM-treated (+TAM) orthotopic KYY tumors. Scale bar represents 40  $\mu\text{m}$ .

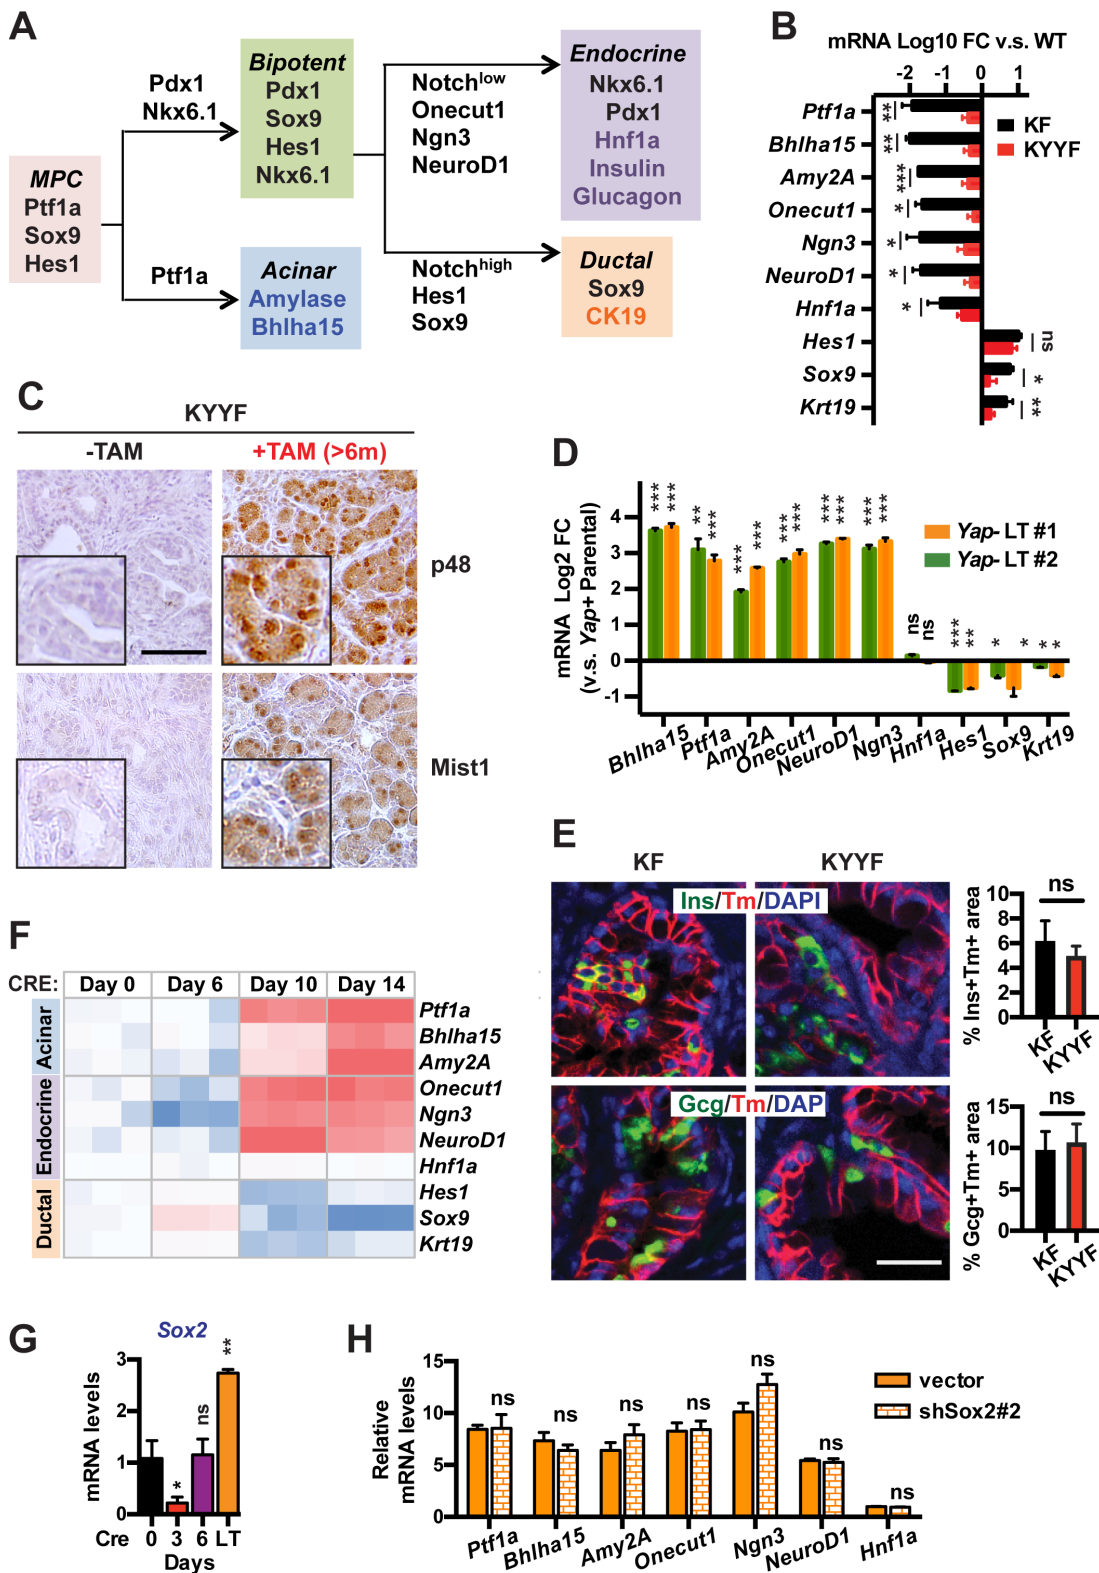

Murakami *et al.* Figure S6

**Figure S6. Related to Figure 6; Effects of Yap or Sox2 ablation on the expression of pancreatic lineage genes in vitro and in vivo.**

**(A)** Schematic illustrating the major steps and key transcriptional factors during lineage commitment in normal pancreatic development.

**(B)** Relative mRNA levels of indicated pancreatic lineage genes in TAM-treated KF and KYYF pancreata normalized to WT pancreata.  $n = 3$ .

**(C)** Representative IHC images of p48/*Ptf1a* and *Mist1/Bhlha15a* in KYYF pancreata that were either untreated (-TAM) or treated for >6 months with TAM. Scale bar indicates 50  $\mu$ m.

**(D)** Log<sub>2</sub> FC of relative mRNA levels of indicated genes in two independent *Yap*<sup>-</sup> KYYF lines relative to *Yap*<sup>+</sup> parental KYYF cells.  $n = 3$ .

**(E)** Representative images and quantification of IF staining for Insulin (Ins; green) or Glucagon (Gcg; green) in combination with tdTomato (red) and DAPI (blue) in KF and KYYF pancreata after ~1.5 months of TAM treatment. Scale bar indicates 100  $\mu$ m.  $n = 5$ .

**(F)** Heatmap of relative mRNA levels of indicated pancreatic lineage markers in KYYF cells at indicated times after CRE treatment.  $n = 3$ .

**(G)** Relative *Sox2* mRNA levels in KYYF cells at indicated time points after Ad-CRE infection.  $n = 3$ .

**(H)** Relative mRNA levels of indicated genes *Yap*<sup>+</sup> and *Yap*<sup>-</sup> KYYF cells at 3 days after infection with lentiviruses carrying vector control or *Sox2* shRNA #2.  $n = 3$ .

\* $P < 0.05$ . \*\* $P < 0.005$ . \*\*\* $P < 0.0005$ . ns: not significant. Error bars indicate s.d.

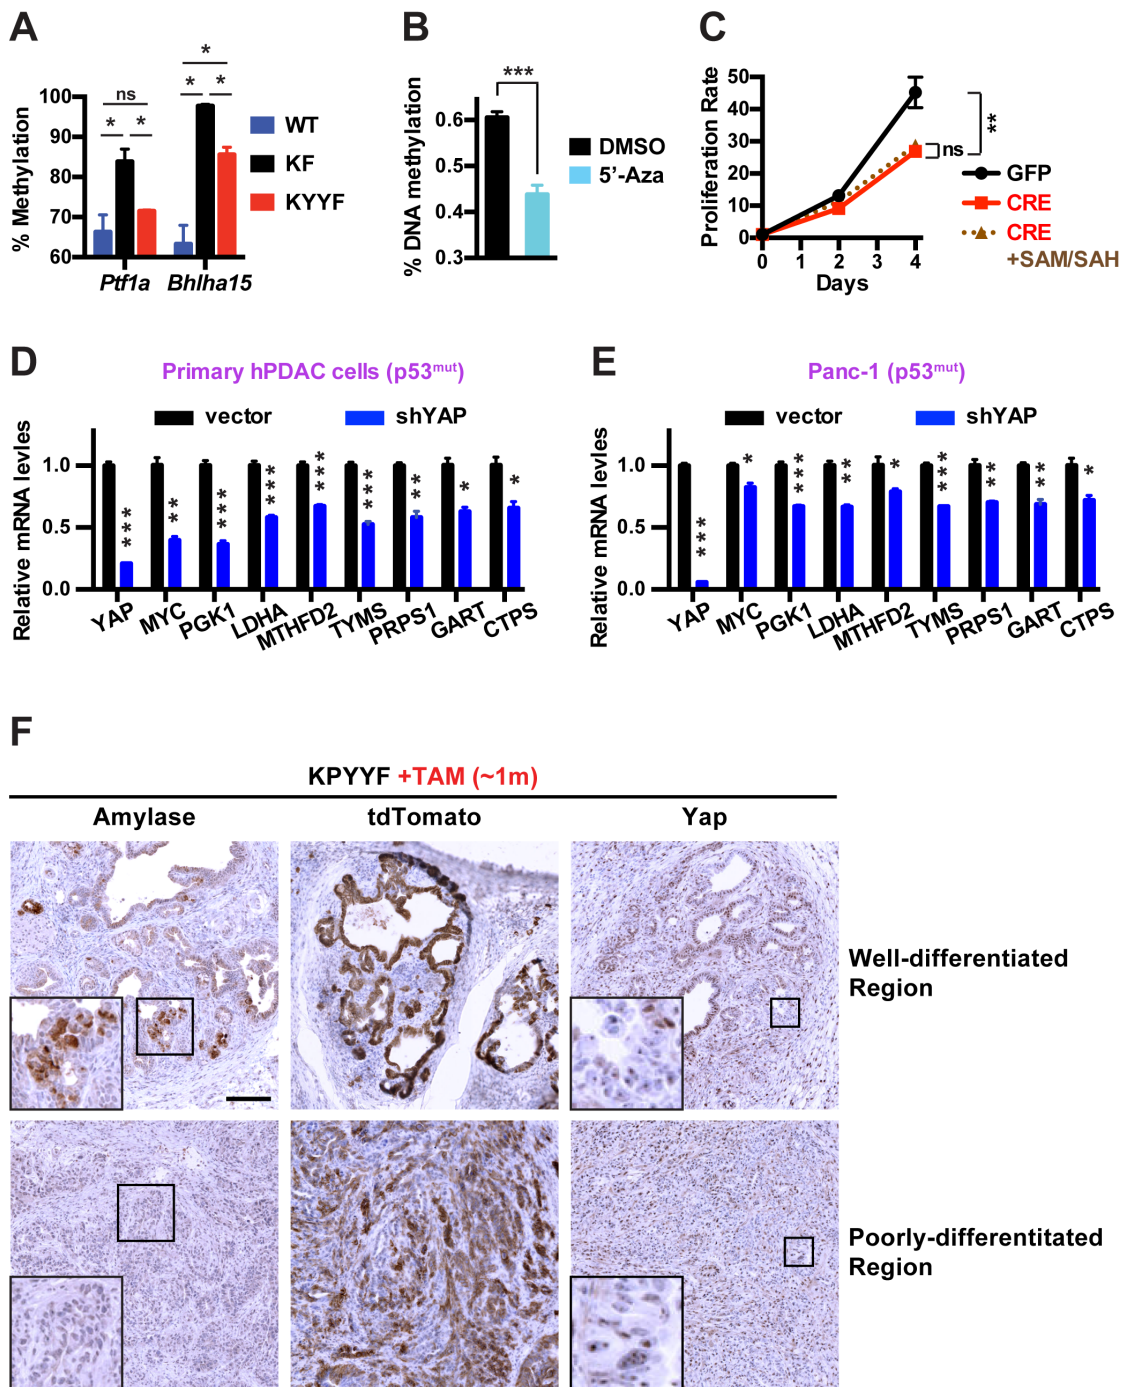

Murakami *et al.* Figure S7

**Figure S7. Related to Figure 7; Effects of Yap ablation on p53 mutant pancreatic tumor cells in vitro and in vivo.**

**(A)** Percent of DNA methylation within the CpG islands of the indicated gene promoters in WT, KF, and KYYP pancreata.  $n = 3$ .

**(B)** Percent of global DNA methylation in KYYP cells at 3 days after treatment of DMSO or 5  $\mu$ M of 5-Aza.  $n = 3$ .

**(C)** Growth curve of KYYP cells untreated or treated with SAM (50  $\mu$ M) and SAH (1  $\mu$ M) after 4 days of infection with Ad-GFP or Ad-CRE.  $n = 3$ .

**(D, E)** Relative mRNA levels of indicated genes in p53 mutant primary human PDAC (D) and Panc-1 (E) cells expressing vector control or shYap.  $n = 3$ .

**(F)** Representative IHC images of Amylase, tdTomato and Yap in the well-differentiated and poorly-differentiated PDAC regions within the same KPYYF pancreas after ~1 month of TAM treatment. Scale bar indicates 300  $\mu$ m.

\* $P < 0.05$ . \*\* $P < 0.005$ . \*\*\* $P < 0.0005$ . Error bars indicate s.d.
